# Supplementary material
Source: PubMed Central journal article supplement (PMC10391182)
Supplement: jmcp.2021.27.11.1532_s001.pdf [file jmcp.2021.27.11.1532_s001.pdf]

## **SUPPLEMENTARY MATERIALS**

### **Cost-effectiveness of a 12-month fixed-duration venetoclax treatment in combination with obinutuzumab in first-line, unfit chronic lymphocytic leukemia in the United States**

Anuja Chatterjee, Sheila Shapouri, Beenish S Manzoor, Arlene Ravelo, Kavita Sail, Venetia Qendri, Gijs van de Wetering, and Matthew S Davids

**Supplementary Figure 1.** Extrapolated PFS Curves Used in the Model

**Supplementary Figure 2.** Extrapolated OS Curves Used in the Model

**Supplementary Figure 3.** Network for Trials in Unfit CLL Used in Network Meta-Analysis

**Supplementary Figure 4.** Results of One-Way Deterministic Sensitivity Analysis, VenG Versus BR

**Supplementary Figure 5.** Results of One-Way Deterministic Sensitivity Analysis, VenG Versus Ibr

**Supplementary Figure 6.** Results of One-Way Deterministic Sensitivity Analysis, VenG Versus Ibr+G

**Supplementary Figure 7.** Results of One-Way Deterministic Sensitivity Analysis, VenG Versus Ibr+R

**Supplementary Figure 8.** Results of One-Way Deterministic Sensitivity Analysis, VenG Versus Acala

**Supplementary Figure 9.** Results of One-Way Deterministic Sensitivity Analysis, VenG Versus Acala+G

**Supplementary Figure 10.** Cost-Effectiveness Acceptability Frontier

**Supplementary Table 1.** Dosing Regimens Used in the Model

**Supplementary Table 2.** Hazard Ratios for Comparators Versus VenG

**Supplementary Table 3.** AE Probabilities

**Supplementary Table 4.** Parameters assessed in sensitivity analysis with the base case and upper and lower bounds

**Supplementary Table 5.** Cost-Effectiveness of VenG Compared with Other Treatments, Scenario Adjusted for GClb Dosing

**Supplementary Table 6.** Cost-Effectiveness of VenG Compared with Other Treatments, Scenario Assuming Treatment Effect for OS (Dependent Model, Exponential Distribution)

**Supplementary Table 7.** Cost-Effectiveness of VenG Compared with Other Treatments, Scenario Assuming no Treatment Effect for OS (Dependent Model, Log-Normal Distribution)

**Supplementary Figure 1.** Extrapolated PFS Curves Used in the Model<sup>a</sup>

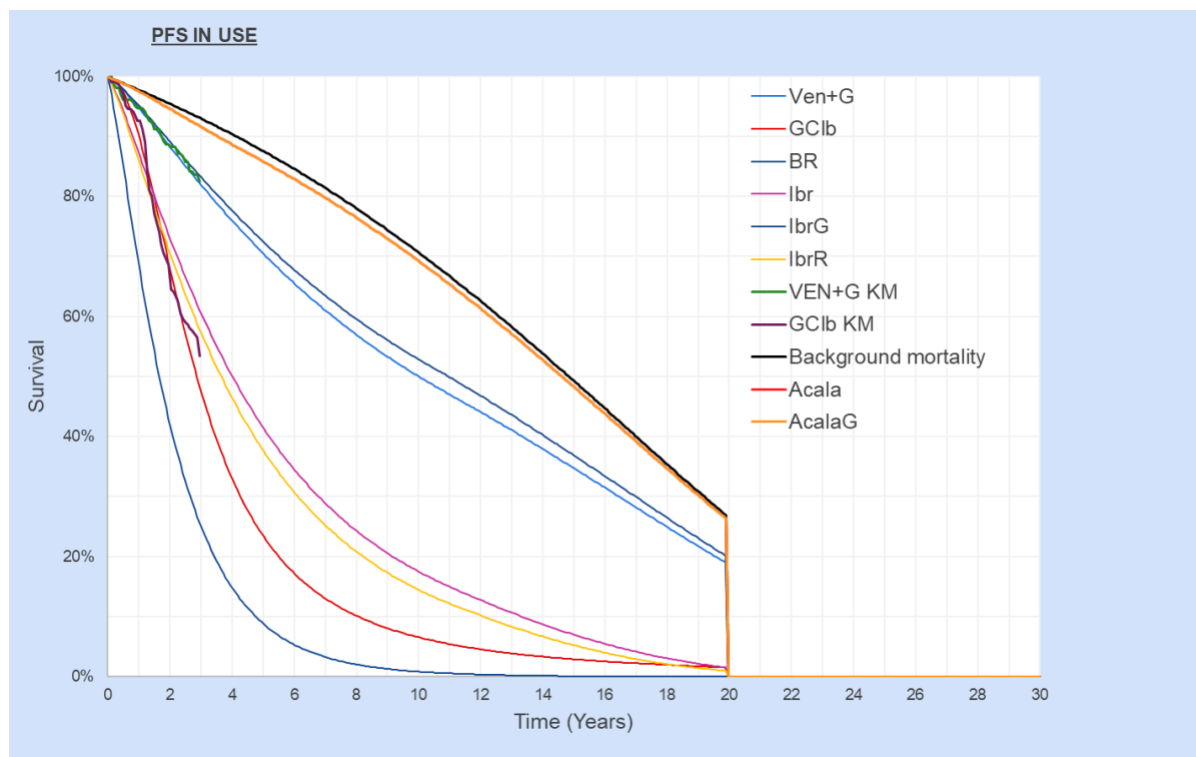

Note: VEN+G KM and GClb KM represent actual PFS data from the CLL14 trial  $\geq 2$  years after treatment cessation; other curves represent extrapolated data used in the current model.

<sup>a</sup>Note, Acala and AcalaG curves overlap on the graph, both are not visible.

Acala=acalabrutinib; B=bendamustine; Clb=chlorambucil; G=obinutuzumab; Ibr=ibrutinib; KM=Kaplan-Meier; Ven=venetoclax.



## Supplementary Figure 2. Extrapolated OS Curves Used in the Model<sup>a</sup>

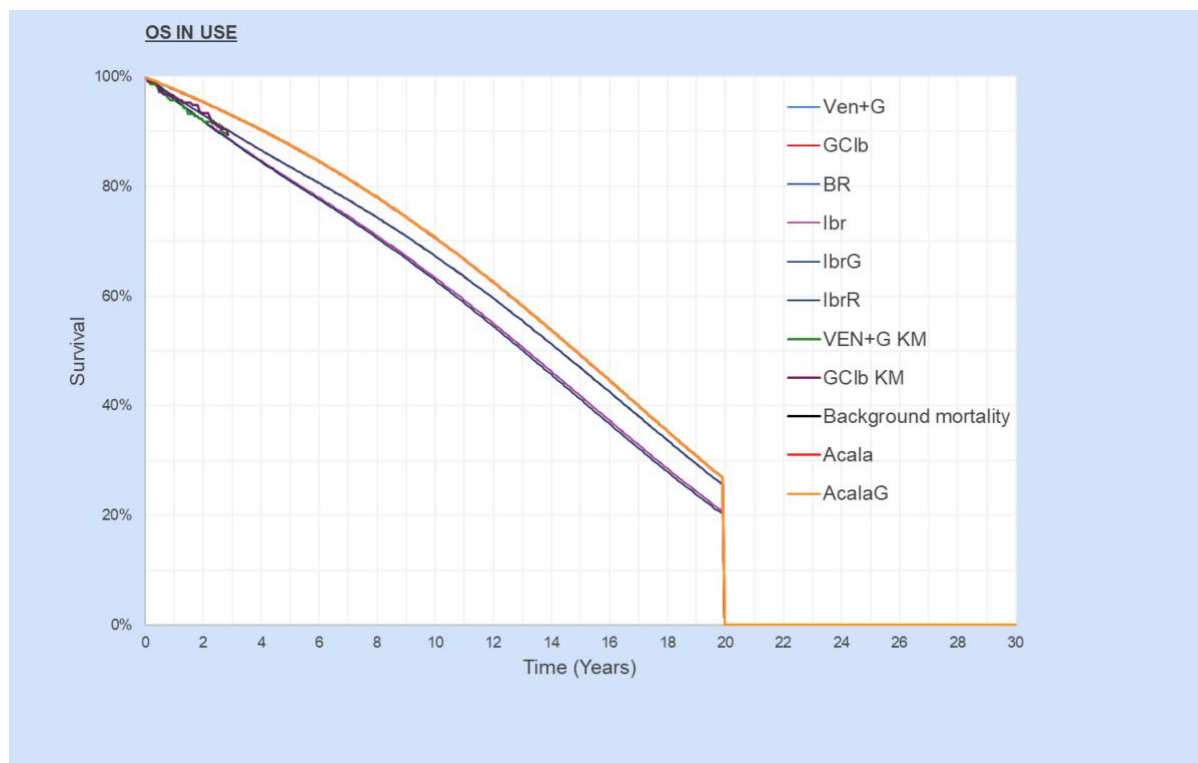

Note: VEN+G KM and GC1b KM represent actual OS data from the CLL14  $\geq 2$  years after treatment cessation; other curves represent extrapolated data used in the current model.

<sup>a</sup>Note, some curves overlap on the graph: VenG, GC1b, and Ibr-G are not all visible; BR, Ibr, and Ibr-R are not all visible; Acala, AcalaG, and background mortality are not all visible.

Acala=acalabrutinib; B=bendamustine; Clb=chlorambucil; G=obinutuzumab; Ibr=ibrutinib; KM=Kaplan-Meier; OS=overall survival;  
Ven=venetoclax.

**Supplementary Figure 3.** Network for Trials in Unfit CLL Used in Network Meta-Analysis

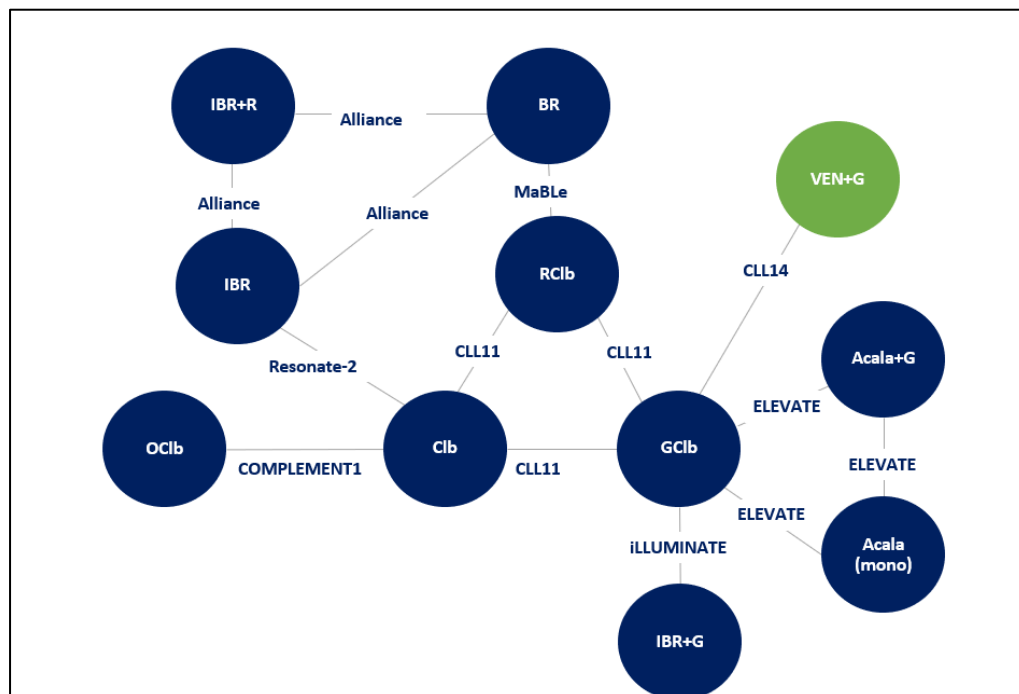

Acala=acalabrutinib; B=bendamustine; Clb=chlorambucil; CLL=chronic lymphocytic leukemia; G=obinutuzumab; I=ibrutinib; mono=monotherapy; Ven=venetoclax.

### Supplementary Figure 4. Results of One-Way Deterministic Sensitivity Analysis, VenG Versus BR

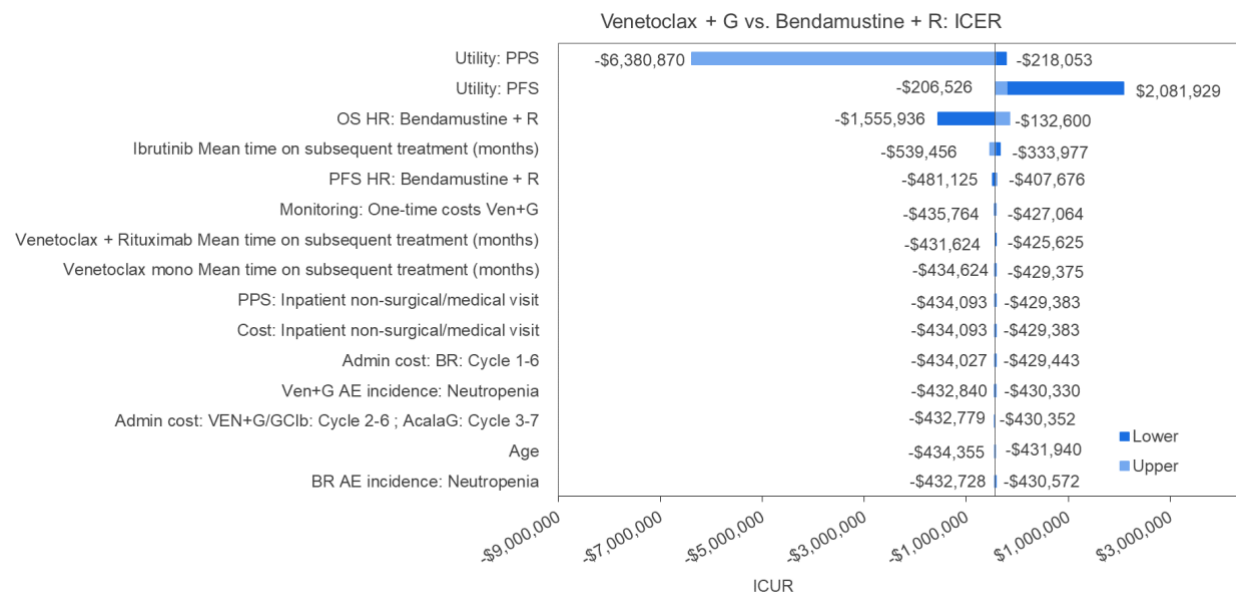

Acala=acalabrutinib; AE=adverse event; B=bendamustine; Clb=chlorambucil; G=obinutuzumab; HR=hazard ratio; ICER=incremental cost effectiveness ratio; ICUR=incremental cost utility ratio; OS=overall survival; PFS=progression-free survival; PPS=post-progression survival; R=rituximab; Ven=venetoclax.



**Supplementary Figure 5. Results of One-Way Deterministic Sensitivity Analysis, VenG Versus Ibr**

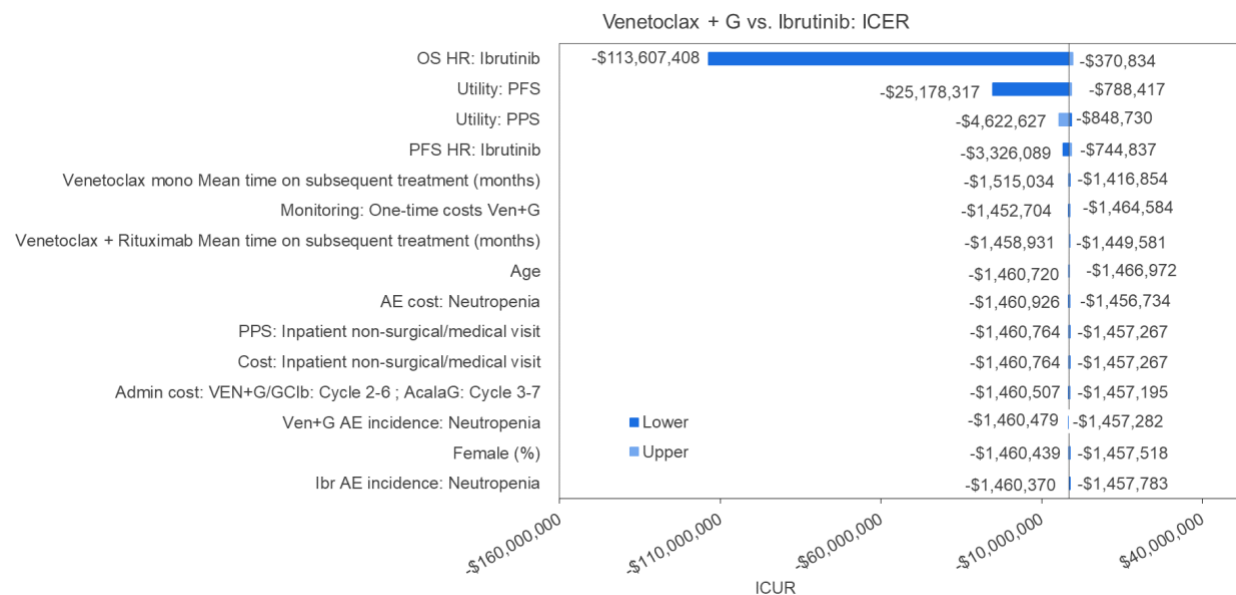

Acala=acalabrutinib; AE=adverse event; Clb=chlorambucil; G=obinutuzumab; HR=hazard ratio; Ibr=ibrutinib; ICER=incremental cost effectiveness ratio; ICUR=incremental cost utility ratio; OS=overall survival; PFS=progression-free survival; PPS=post-progression survival; Ven=venetoclax.

### Supplementary Figure 6. Results of One-Way Deterministic Sensitivity Analysis, VenG Versus Ibr+G

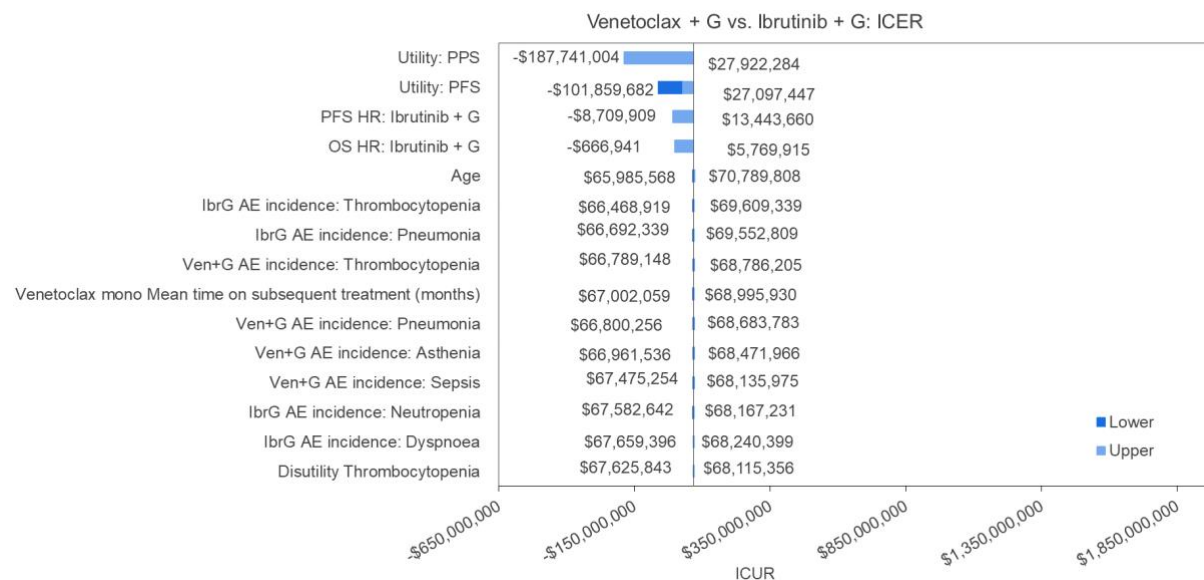

Acala=acalabrutinib; AE=adverse event; G=obinutuzumab; HR=hazard ratio; Ibr=ibrutinib; ICER=incremental cost effectiveness ratio; ICUR=incremental cost utility ratio; OS=overall survival; PFS=progression-free survival; PPS=post-progression survival; Ven=venetoclax.

## Supplementary Figure 7. Results of One-Way Deterministic Sensitivity Analysis, VenG Versus Ibr+R

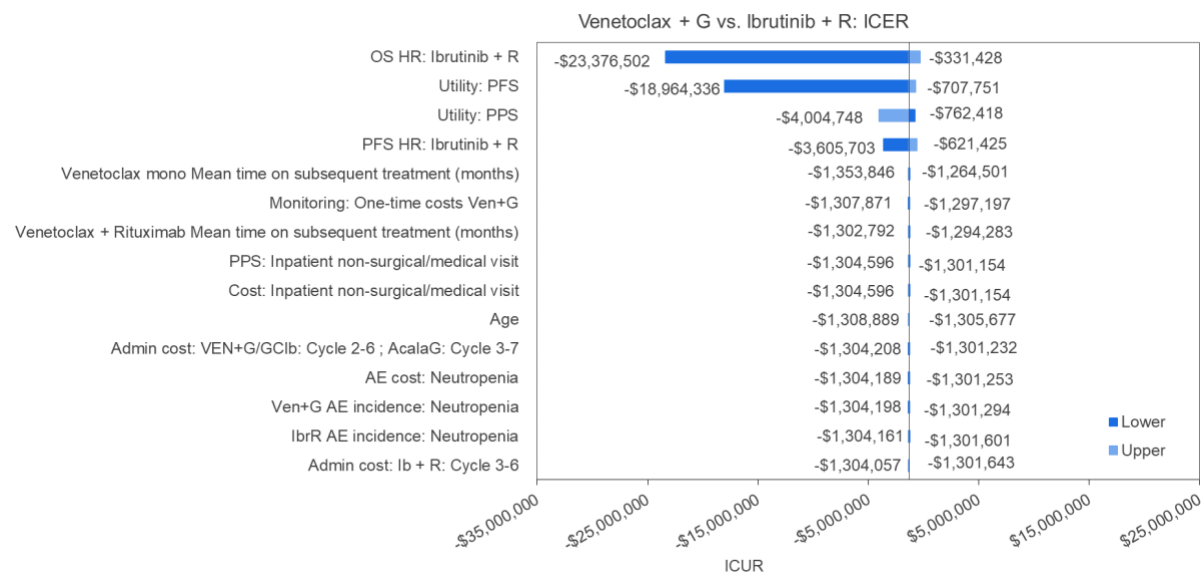

Acala=acalabrutinib; AE=adverse event; Clb=chlorambucil; G=obinutuzumab; HR=hazard ratio; Ibr=ibrutinib; ICER=incremental cost effectiveness ratio; ICUR=incremental cost utility ratio; OS=overall survival; PFS=progression-free survival; PPS=post-progression survival; R=rituximab; Ven=venetoclax.

**Supplementary Figure 8. Results of One-Way Deterministic Sensitivity Analysis, VenG Versus Acala**

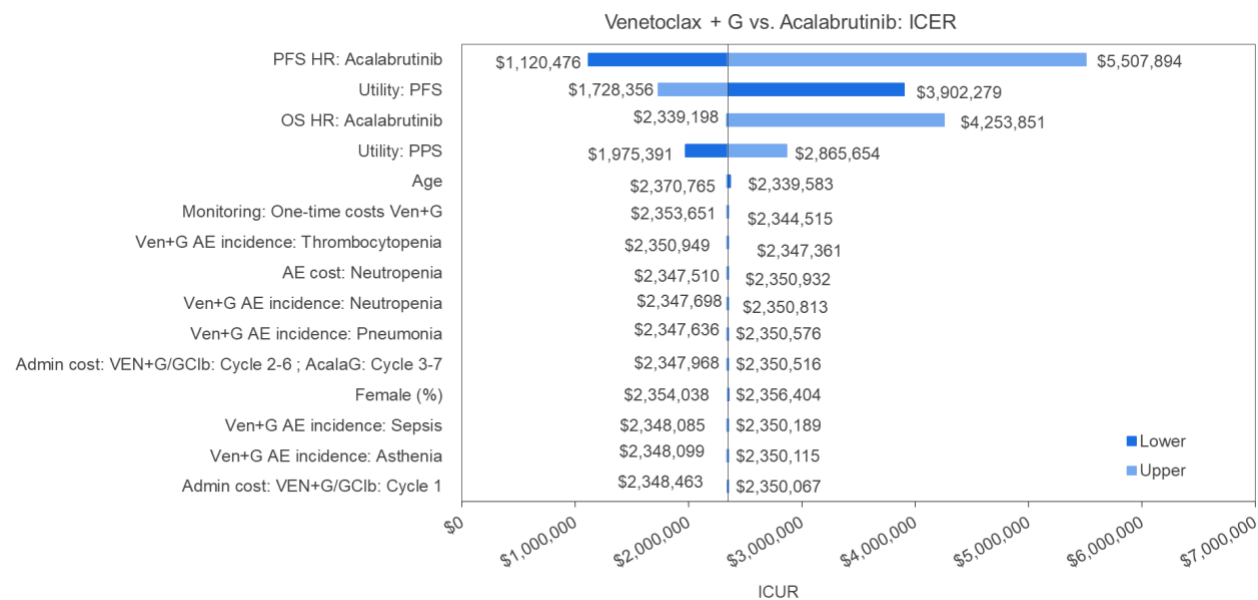

Acala=acalabrutinib; AE=adverse event; G=obinutuzumab; HR=hazard ratio; Ibr=ibrutinib; ICER=incremental cost effectiveness ratio; ICUR=incremental cost utility ratio; OS=overall survival; PFS=progression-free survival; PPS=post-progression survival; Ven=venetoclax.

**Supplementary Figure 9. Results of One-Way Deterministic Sensitivity Analysis, VenG Versus Acala+G**

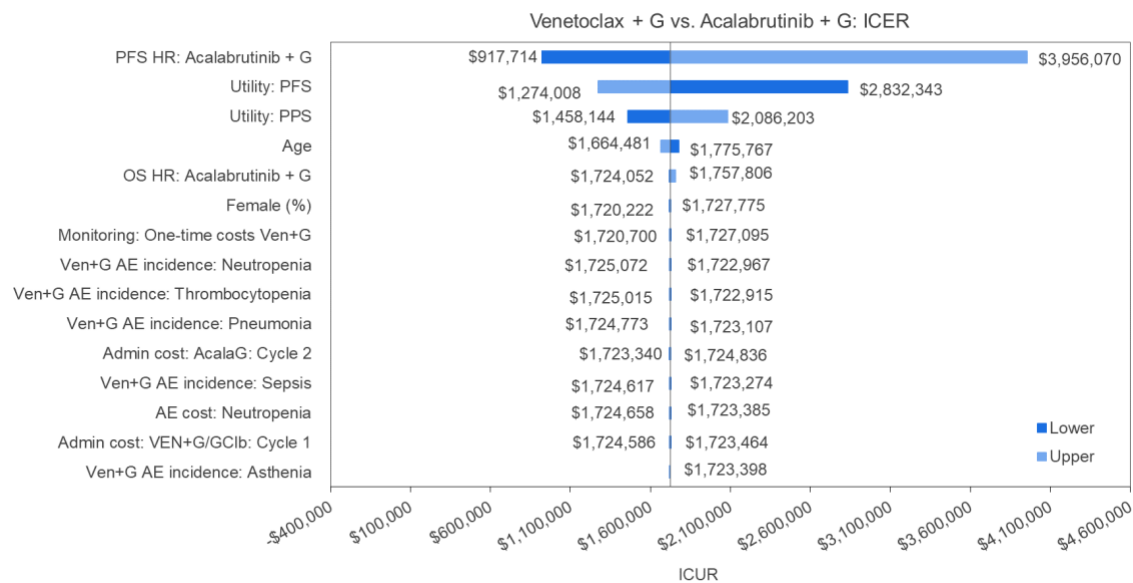

Acala=acalabrutinib; AE=adverse event; B=bendamustine; G=obinutuzumab; HR=hazard ratio; ICER=incremental cost effectiveness ratio; ICUR=incremental cost utility ratio; OS=overall survival; PFS=progression-free survival; PPS=post-progression survival; Ven=venetoclax.

### Supplementary Figure 10. Cost-Effectiveness Acceptability Frontier

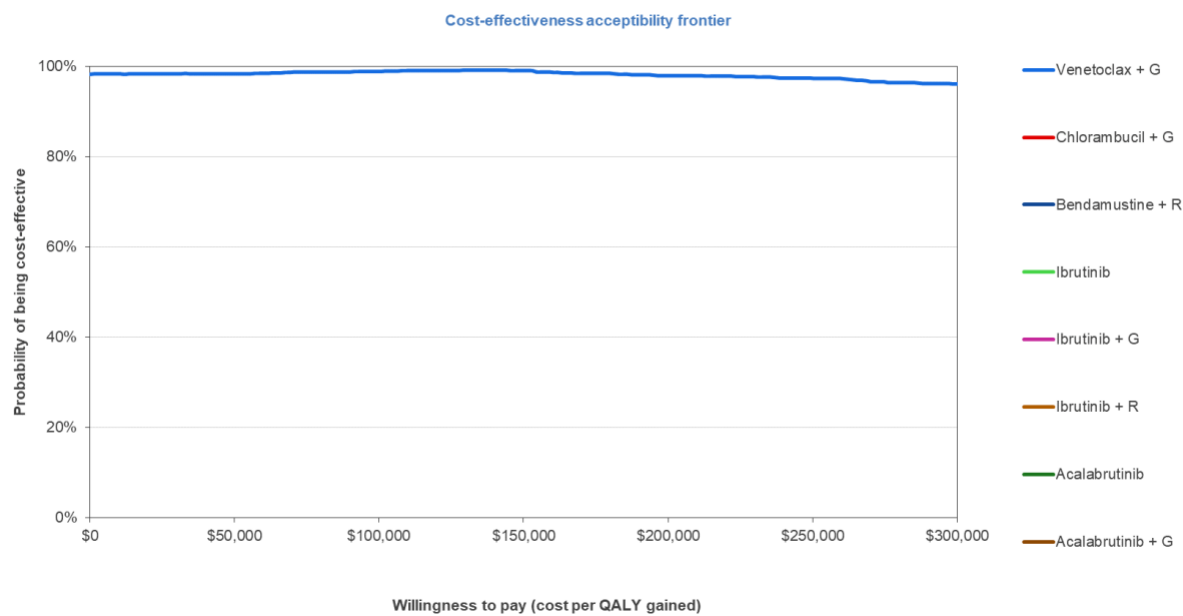

G=obinutuzumab; QALY=quality-adjusted life-year; R=rituximab.

**Supplementary Table 1. Dosing Regimens Used in the Model**

| Regimen | Drug         | Administration | Dosing schedule                                                                                                                                                                                                                                                                                                                                                                     | Trial              |
|---------|--------------|----------------|-------------------------------------------------------------------------------------------------------------------------------------------------------------------------------------------------------------------------------------------------------------------------------------------------------------------------------------------------------------------------------------|--------------------|
| VenG    | Venetoclax   | Oral           | Venetoclax: <ul style="list-style-type: none"> <li>• 20 mg daily during Cycle 1, Days 22–28</li> <li>• 50 mg daily during Cycle 2, Days 1–7</li> <li>• 100 mg daily during Cycle 2, Days 8–14</li> <li>• 200 mg daily during Cycle 2, Days 15–21</li> <li>• 400 mg daily during Cycle 2, Days 22–28 and on Days 1–28 for all subsequent cycles until the end of Cycle 12</li> </ul> | CLL14 <sup>6</sup> |
|         | Obinutuzumab | IV             | <ul style="list-style-type: none"> <li>• 1000mg at Cycle 1, Day 1</li> <li>• 1000 mg at Cycle 1, Day 8 and Day 15</li> <li>• 1000 mg at Day 1 for all subsequent cycles until the end of Cycle 6</li> </ul>                                                                                                                                                                         | CLL14 <sup>6</sup> |

|       |              |                |                                                                                                                                                                                                             |                                                                         |
|-------|--------------|----------------|-------------------------------------------------------------------------------------------------------------------------------------------------------------------------------------------------------------|-------------------------------------------------------------------------|
| GC1b  | Obinutuzumab | IV             | <ul style="list-style-type: none"> <li>• 1000mg at Cycle 1, Day 1</li> <li>• 1000 mg at Cycle 1, Day 8 and Day 15</li> <li>• 1000 mg at Day 1 for all subsequent cycles until the end of Cycle 6</li> </ul> | CLL11 <sup>7</sup>                                                      |
|       | Chlorambucil | Oral           | 0.5 mg/kg at Day 1 and Day 15 for Cycles 1–12                                                                                                                                                               | CLL14 <sup>6</sup>                                                      |
| BR    | Bendamustine | IV<br>(By BSA) | 90 mg/m <sup>2</sup> on Day 1 and Day 2 of a 28-day cycle. Given for 6 cycles.                                                                                                                              | CLL10, <sup>8</sup><br>GCLLSG, <sup>55</sup><br>and MABLE <sup>56</sup> |
|       | Rituximab    | IV<br>(By BSA) | 375 mg/m <sup>2</sup> for the first cycle and 500 mg/m <sup>2</sup> for subsequent cycles. Given for 6 cycles                                                                                               | CLL10, <sup>8</sup><br>GCLLSG, <sup>55</sup><br>and MABLE <sup>56</sup> |
| Ibr   | Ibrutinib    | Oral           | 420mg daily continuously<br><br>(until evidence of progressive disease or no longer being tolerated by the patient)                                                                                         | RESONATE-2 <sup>30</sup>                                                |
| Ibr+G | Ibrutinib    | Oral           | 420mg (3 x 140 mg capsules) once daily until disease                                                                                                                                                        | ILLUMINATE <sup>31</sup>                                                |



|         |                        |                |                                                                                                                                                     |                          |
|---------|------------------------|----------------|-----------------------------------------------------------------------------------------------------------------------------------------------------|--------------------------|
|         |                        |                | progression or unacceptable toxicity                                                                                                                |                          |
|         | Obinutuzumab           | IV             | 1000mg over 6 cycles: Days 1 and 2 (100mg on Day 1 and 900mg on Day 2), Day 8 and Day 15 of Cycle 1 followed by Day 1 only on Cycles 2–6.           | ILLUMINATE <sup>31</sup> |
| Ibr+R   | Ibrutinib              | Oral           | 420 mg/day until disease progression                                                                                                                | ECOG <sup>57</sup>       |
|         | Rituximab <sup>a</sup> | IV<br>(By BSA) | Cycle 2, Day 1: 50 mg/m <sup>2</sup><br>Cycle 2, Day 2: 325 mg/m <sup>2</sup><br>In subsequent cycles:<br>Day 1: 500 mg/m <sup>2</sup> for 7 cycles | ECOG <sup>57</sup>       |
| Acala   | Acalabrutinib          | Oral           | 100mg twice a day = 200mg/day from Cycle 1 Day 1 until disease progression or unacceptable toxicity                                                 | ELEVATE-TN <sup>15</sup> |
| Acala+G | Acalabrutinib          | Oral           | 100mg twice a day = 200mg/day from Cycle 1 Day 1 until disease progression or unacceptable toxicity                                                 |                          |

|  |              |    |                                                                                                                                                                                                     |                          |
|--|--------------|----|-----------------------------------------------------------------------------------------------------------------------------------------------------------------------------------------------------|--------------------------|
|  |              |    |                                                                                                                                                                                                     |                          |
|  | Obinutuzumab | IV | <ul style="list-style-type: none"> <li>• Cycle 2, Day 1 (100mg), Day 2 (900mg), 1000mg at Day 8 and Day 15</li> <li>• 1000mg at Day 1 for all subsequent cycles until the end of Cycle 7</li> </ul> | ELEVATE-TN <sup>15</sup> |

<sup>a</sup>For Ibr+R, the most recently published trial (2019) was chosen (ECOG-ACRIN phase III trial E1912) to inform the dosing schedule for rituximab, since this was different to the other dosing schedules commonly adopted for rituximab. The most recent dosing schedule for Ibr+R was therefore chosen over an older publication for the ALLIANCE trial.

Acala=acalabrutinib; B=bendamustine; Clb=chlorambucil; Ibr=ibrutinib; R=rituximab; Ven=venetoclax.

**Supplementary Table 3. AE Probabilities**

|                     |                    |                    |                    |                          |                          |                       |                          |                          |
|---------------------|--------------------|--------------------|--------------------|--------------------------|--------------------------|-----------------------|--------------------------|--------------------------|
|                     |                    |                    |                    |                          |                          |                       |                          |                          |
| Asthenia            | 2.80               | 0.50               | 0.00               | 0.00                     | 0.00                     | 0.00                  | 0.00                     | 0.00                     |
| Diarrhea            | 3.80               | 0.50               | 7.00               | 4.00                     | 3.00                     | 0.00                  | 0.56                     | 4.49                     |
| Dyspnea             | 2.40               | 0.50               | 0.00               | 0.00                     | 2.00                     | 0.00                  | 0.00                     | 0.00                     |
| Febrile neutropenia | 5.20               | 3.70               | 0.00               | 1.00                     | 5.00                     | 1.00                  | 1.12                     | 1.69                     |
| IRR                 | 9.00               | 10.30              | 0.00               | 0.00                     | 2.00                     | 0.00                  | 0.00                     | 2.25                     |
| Leukopenia          | 2.40               | 4.70               | 48.00              | 0.00                     | 1.00                     | 0.00                  | 0.00                     | 0.00                     |
| Neutropenia         | 52.80              | 47.70              | 59.00              | 12.00                    | 37.00                    | 21.00                 | 9.50                     | 29.78                    |
| Pneumonia           | 5.70               | 4.20               | 9.00               | 0.00                     | 7.00                     | 0.00                  | 2.23                     | 5.62                     |
| Sepsis              | 4.20               | 1.40               | 1.00               | 0.00                     | 0.00                     | 5.00                  | 0.00                     | 0.00                     |
| Thrombocytopenia    | 13.70              | 15.00              | 14.00              | 0.00                     | 19.00                    | 5.00                  | 2.79                     | 8.43                     |
| Source              | CLL14 <sup>6</sup> | CLL14 <sup>6</sup> | CLL10 <sup>8</sup> | RESONATE-2 <sup>30</sup> | iLLUMINATE <sup>31</sup> | A041202 <sup>32</sup> | ELEVATE TN <sup>15</sup> | ELEVATE TN <sup>15</sup> |

Acala=acalabrutinib; AE=adverse events; B=bendamustine; Clb=chlorambucil; Ibr=ibrutinib; IRR=infusion-related reaction;

R=rituximab; Ven=venetoclax.

**Supplementary Table 2. Hazard Ratios for Comparators Versus VenG**

| <b>Treatment</b> | <b>HR versus VenG</b> | <b>95% lower CI</b> | <b>95% upper CI</b> |
|------------------|-----------------------|---------------------|---------------------|
| <b>PFS</b>       |                       |                     |                     |
| Acala            | 0.6                   | 0.3                 | 1.0                 |
| Acala+G          | 0.4                   | 0.2                 | 0.8                 |
| BR               | 6.9                   | 3.3                 | 13.2                |
| lbr+G            | 0.9                   | 0.5                 | 1.6                 |
| lbr              | 2.5                   | 1.4                 | 4.3                 |
| lbr+R            | 2.8                   | 1.2                 | 5.4                 |
| <b>OS</b>        |                       |                     |                     |
| Acala            | 0.6                   | 0.3                 | 1.2                 |
| Acala+G          | 0.5                   | 0.2                 | 1.1                 |
| BR               | 1.2                   | 0.5                 | 2.4                 |
| lbr+G            | 1.0                   | 0.4                 | 2.1                 |
| lbr              | 1.2                   | 0.5                 | 2.3                 |
| lbr+R            | 1.2                   | 0.4                 | 2.6                 |

Acala=acalabrutinib; B=bendamustine; CI=confidence interval; G=obinutuzumab;

HR=hazard ratio; lbr=ibrutinib; OS=overall survival; PFS=progression-free survival;

R=rituximab; Ven=venetoclax.

**Supplementary Table 3. AE Probabilities**

| <b>AE incidence, %</b> | <b>VenG<br/>n=212</b> | <b>GC1b<br/>n=214</b> | <b>BR<br/>n=279</b> | <b>lbr<br/>n=136</b>     | <b>lbr+G<br/>n=113</b>   | <b>lbr+R<br/>n=181</b> | <b>Acala<br/>n=179</b>   | <b>Acala+G<br/>n=178</b> |
|------------------------|-----------------------|-----------------------|---------------------|--------------------------|--------------------------|------------------------|--------------------------|--------------------------|
| Asthenia               | 2.80                  | 0.50                  | 0.00                | 0.00                     | 0.00                     | 0.00                   | 0.00                     | 0.00                     |
| Diarrhea               | 3.80                  | 0.50                  | 7.00                | 4.00                     | 3.00                     | 0.00                   | 0.56                     | 4.49                     |
| Dyspnea                | 2.40                  | 0.50                  | 0.00                | 0.00                     | 2.00                     | 0.00                   | 0.00                     | 0.00                     |
| Febrile neutropenia    | 5.20                  | 3.70                  | 0.00                | 1.00                     | 5.00                     | 1.00                   | 1.12                     | 1.69                     |
| IRR                    | 9.00                  | 10.30                 | 0.00                | 0.00                     | 2.00                     | 0.00                   | 0.00                     | 2.25                     |
| Leukopenia             | 2.40                  | 4.70                  | 48.00               | 0.00                     | 1.00                     | 0.00                   | 0.00                     | 0.00                     |
| Neutropenia            | 52.80                 | 47.70                 | 59.00               | 12.00                    | 37.00                    | 21.00                  | 9.50                     | 29.78                    |
| Pneumonia              | 5.70                  | 4.20                  | 9.00                | 0.00                     | 7.00                     | 0.00                   | 2.23                     | 5.62                     |
| Sepsis                 | 4.20                  | 1.40                  | 1.00                | 0.00                     | 0.00                     | 5.00                   | 0.00                     | 0.00                     |
| Thrombocytopenia       | 13.70                 | 15.00                 | 14.00               | 0.00                     | 19.00                    | 5.00                   | 2.79                     | 8.43                     |
| Source                 | CLL14 <sup>6</sup>    | CLL14 <sup>6</sup>    | CLL10 <sup>8</sup>  | RESONATE-2 <sup>30</sup> | iLLUMINATE <sup>31</sup> | A041202 <sup>32</sup>  | ELEVATE TN <sup>15</sup> | ELEVATE TN <sup>15</sup> |

Acala=acalabrutinib; AE=adverse events; B=bendamustine; Clb=chlorambucil; lbr=ibrutinib; IRR=infusion-related reaction;

R=rituximab; Ven=venetoclax.

**Supplementary Table 4.** Parameters assessed in sensitivity analysis with the base case and upper and lower bounds

| <b>Parameter</b>                                                | <b>Base case</b> | <b>Lower</b> | <b>Upper</b> |
|-----------------------------------------------------------------|------------------|--------------|--------------|
| Age                                                             | 71.08            | 70.31        | 71.84        |
| Bodyweight                                                      | 75.75            | 74.23        | 77.26        |
| Female (%)                                                      | 0.33             | 0.29         | 0.38         |
| Pre-progression health state utility (all treatments)           | 0.67             | 0.53         | 0.79         |
| Post-progression health state utility (all treatments)          | 0.60             | 0.48         | 0.71         |
| End-of-life costs                                               | \$19,694.97      | \$16,024.61  | \$23,738.14  |
| <b>Monitoring costs</b>                                         |                  |              |              |
| One-time costs Ven+G                                            | \$15,686.00      | \$12,762.76  | \$18,906.17  |
| Biochemistry test: liver function test                          | \$9.08           | \$7.39       | \$10.94      |
| Biochemistry test: renal - urea and electrolytes test (UE test) | \$11.74          | \$9.55       | \$14.15      |
| Bone marrow exam                                                | \$72.08          | \$58.65      | \$86.88      |
| Chest X-ray                                                     | \$25.23          | \$20.53      | \$30.41      |
| CT scan                                                         | \$199.30         | \$162.16     | \$240.21     |
| Full blood count                                                | \$8.63           | \$7.02       | \$10.40      |
| Full blood transfusion                                          | \$494.08         | \$402.00     | \$595.51     |
| Hematologist visit                                              | \$51.90          | \$42.23      | \$62.55      |
| Immunoglobulins blood test                                      | \$13.84          | \$11.26      | \$16.68      |
| Inpatient non-surgical/medical visit                            | \$690.10         | \$561.49     | \$831.77     |
| Lactate dehydrogenase                                           | \$6.71           | \$5.46       | \$8.09       |
| Tumor lysis syndrome prophylaxis                                | \$15,686.00      | \$12,762.76  | \$18,906.17  |
| <b>Drug administration costs</b>                                |                  |              |              |
| Acala+G: C2                                                     | \$3,682.72       | \$2,996.41   | \$4,438.74   |
| BR: C1–6                                                        | \$1,474.34       | \$1,199.58   | \$1,777.01   |
| CR: C1–6                                                        | \$920.68         | \$749.10     | \$1,109.69   |

|                                   |             |             |             |
|-----------------------------------|-------------|-------------|-------------|
| FCR: C1                           | \$920.68    | \$749.10    | \$1,109.69  |
| FCR: C2–6                         | \$1,141.93  | \$929.12    | \$1,376.36  |
| lbr+R: C2                         | \$1,841.36  | \$1,498.20  | \$2,219.37  |
| lbr+R: C3–6                       | \$920.68    | \$749.10    | \$1,109.69  |
| lbr+G: C1                         | \$3,682.72  | \$2,996.41  | \$4,438.74  |
| lbr+G: C1–6                       | \$920.68    | \$749.10    | \$1,109.69  |
| IV                                | \$298.53    | \$242.89    | \$359.81    |
| Rapid IV                          | \$238.19    | \$193.80    | \$287.09    |
| SC                                | \$38.50     | \$31.33     | \$46.40     |
| VenG/GC1b: C1                     | \$2,762.04  | \$2,247.31  | \$3,329.06  |
| VenG/GC1b: C2-6;<br>Acala+G: C3–7 | \$920.68    | \$749.10    | \$1,109.69  |
| Ven+R: C1–6                       | \$920.68    | \$749.10    | \$1,109.69  |
| <b>AE costs</b>                   |             |             |             |
| Asthenia                          | \$4,810.18  | \$3,913.76  | \$5,797.66  |
| Diarrhea                          | \$5,172.65  | \$4,208.67  | \$6,234.54  |
| Dyspnea                           | \$11,903.85 | \$9,685.45  | \$14,347.59 |
| Febrile neutropenia               | \$13,545.98 | \$11,021.55 | \$16,326.82 |
| IRR                               | \$7,289.00  | \$5,930.62  | \$8,785.36  |
| Leukopenia                        | \$6,911.00  | \$5,623.07  | \$8,329.76  |
| Neutropenia                       | \$13,565.69 | \$11,037.59 | \$16,350.58 |
| Pneumonia                         | \$9,046.00  | \$7,360.19  | \$10,903.05 |
| Sepsis                            | \$17,661.00 | \$14,369.69 | \$21,286.62 |
| Thrombocytopenia                  | \$10,017.00 | \$8,150.23  | \$12,073.38 |
| <b>AE disutilities</b>            |             |             |             |
| Asthenia                          | 0.12        | 0.09        | 0.14        |
| Diarrhea                          | 0.08        | 0.07        | 0.09        |
| Dyspnea                           | 0.10        | 0.08        | 0.12        |
| Febrile neutropenia               | 0.15        | 0.12        | 0.18        |

|                           |       |       |       |
|---------------------------|-------|-------|-------|
| IRR                       | 0.20  | 0.16  | 0.24  |
| Leukopenia                | 0.09  | 0.07  | 0.11  |
| Neutropenia               | 0.09  | 0.09  | 0.09  |
| Pneumonia                 | 0.20  | 0.19  | 0.20  |
| Sepsis                    | 0.20  | 0.19  | 0.20  |
| Thrombocytopenia          | 0.11  | 0.09  | 0.13  |
| <b>AE duration (days)</b> |       |       |       |
| Asthenia                  | 35.33 | 28.75 | 42.58 |
| Diarrhea                  | 3.50  | 2.85  | 4.22  |
| Dyspnea                   | 12.70 | 10.33 | 15.31 |
| Febrile neutropenia       | 3.50  | 2.85  | 4.22  |
| IRR                       | 3.50  | 2.85  | 4.22  |
| Leukopenia                | 14.00 | 11.39 | 16.87 |
| Neutropenia               | 3.50  | 2.85  | 4.22  |
| Pneumonia                 | 18.21 | 14.82 | 21.95 |
| Sepsis                    | 7.00  | 5.70  | 8.44  |
| Thrombocytopenia          | 23.20 | 18.87 | 27.96 |
| <b>AE incidence</b>       |       |       |       |
| <i>BR</i>                 |       |       |       |
| Diarrhea                  | 0.07  | 0.04  | 0.10  |
| Leukopenia                | 0.48  | 0.42  | 0.54  |
| Neutropenia               | 0.59  | 0.53  | 0.65  |
| Pneumonia                 | 0.09  | 0.06  | 0.13  |
| Sepsis                    | 0.01  | 0.00  | 0.02  |
| Thrombocytopenia          | 0.14  | 0.10  | 0.18  |
| <i>GClb</i>               |       |       |       |
| Asthenia                  | 0.01  | 0.00  | 0.02  |
| Diarrhea                  | 0.01  | 0.00  | 0.02  |
| Dyspnea                   | 0.01  | 0.00  | 0.02  |



|                     |      |      |      |
|---------------------|------|------|------|
| Febrile neutropenia | 0.04 | 0.02 | 0.07 |
| IRR                 | 0.10 | 0.07 | 0.15 |
| Leukopenia          | 0.05 | 0.02 | 0.08 |
| Neutropenia         | 0.48 | 0.41 | 0.55 |
| Pneumonia           | 0.04 | 0.02 | 0.07 |
| Sepsis              | 0.01 | 0.00 | 0.03 |
| Thrombocytopenia    | 0.15 | 0.11 | 0.20 |
| <i>Ibr</i>          |      |      |      |
| Diarrhea            | 0.04 | 0.01 | 0.08 |
| Febrile neutropenia | 0.01 | 0.00 | 0.03 |
| Neutropenia         | 0.12 | 0.07 | 0.18 |
| <i>Ibr+G</i>        |      |      |      |
| Diarrhea            | 0.03 | 0.01 | 0.07 |
| Dyspnea             | 0.02 | 0.00 | 0.05 |
| Febrile neutropenia | 0.05 | 0.02 | 0.10 |
| IRR                 | 0.02 | 0.00 | 0.05 |
| Leukopenia          | 0.01 | 0.00 | 0.03 |
| Neutropenia         | 0.37 | 0.29 | 0.46 |
| Pneumonia           | 0.07 | 0.03 | 0.12 |
| Thrombocytopenia    | 0.19 | 0.12 | 0.27 |
| <i>Ibr+R</i>        |      |      |      |
| Febrile neutropenia | 0.01 | 0.00 | 0.03 |
| Neutropenia         | 0.21 | 0.15 | 0.27 |
| Sepsis              | 0.05 | 0.02 | 0.09 |
| Thrombocytopenia    | 0.05 | 0.02 | 0.09 |
| <i>VenG</i>         |      |      |      |
| Asthenia            | 0.03 | 0.01 | 0.05 |
| Diarrhea            | 0.04 | 0.02 | 0.07 |
| Dyspnea             | 0.02 | 0.01 | 0.05 |

|                                                   |       |       |       |
|---------------------------------------------------|-------|-------|-------|
| Febrile neutropenia                               | 0.05  | 0.03  | 0.09  |
| IRR                                               | 0.09  | 0.06  | 0.13  |
| Leukopenia                                        | 0.02  | 0.01  | 0.05  |
| Neutropenia                                       | 0.53  | 0.46  | 0.60  |
| Pneumonia                                         | 0.06  | 0.03  | 0.09  |
| Sepsis                                            | 0.04  | 0.02  | 0.07  |
| Thrombocytopenia                                  | 0.14  | 0.09  | 0.19  |
| <b>Mean time on subsequent treatment (months)</b> |       |       |       |
| lbr                                               | 39.00 | 31.73 | 47.01 |
| Ven+R                                             | 24.40 | 19.85 | 29.41 |
| Ven monotherapy                                   | 16.00 | 13.02 | 19.28 |
| <b>OS HR</b>                                      |       |       |       |
| Acala                                             | 0.63  | 0.29  | 1.19  |
| Acala+G                                           | 0.52  | 0.18  | 1.14  |
| BR                                                | 1.15  | 0.46  | 2.40  |
| lbr                                               | 1.15  | 0.47  | 2.34  |
| lbr+G                                             | 1.00  | 0.39  | 2.13  |
| lbr+R                                             | 1.17  | 0.43  | 2.57  |
| lbr del17p/ <i>TP53</i> HR                        | 0.84  | 0.30  | 2.35  |
| <b>PFS HR</b>                                     |       |       |       |
| Acala                                             | 0.57  | 0.30  | 0.97  |
| Acala+G                                           | 0.43  | 0.22  | 0.79  |
| BR                                                | 6.94  | 3.25  | 13.19 |
| lbr                                               | 2.51  | 1.35  | 4.33  |
| lbr+G                                             | 0.92  | 0.48  | 1.61  |
| lbr+R                                             | 2.79  | 1.23  | 5.43  |
| lbr del17p/ <i>TP53</i> HR                        | 0.66  | 0.27  | 1.62  |
| <b>Per-cycle frequency of resource use</b>        |       |       |       |

|                                                                 |      |      |      |
|-----------------------------------------------------------------|------|------|------|
| <i>Pre-progression</i>                                          |      |      |      |
| Biochemistry test: liver function test                          | 0.23 | 0.19 | 0.28 |
| Biochemistry test: renal - urea and electrolytes test (UE test) | 0.23 | 0.19 | 0.28 |
| Full blood count                                                | 0.23 | 0.19 | 0.28 |
| Hematologist visit                                              | 0.23 | 0.19 | 0.28 |
| Immunoglobulins blood test                                      | 0.08 | 0.06 | 0.09 |
| Lactate dehydrogenase                                           | 0.23 | 0.19 | 0.28 |
| <i>Post-progression</i>                                         |      |      |      |
| CT scan                                                         | 0.15 | 0.12 | 0.18 |
| Full blood count                                                | 0.61 | 0.50 | 0.74 |
| Hematologist visit                                              | 0.46 | 0.37 | 0.55 |
| Immunoglobulins blood test                                      | 0.08 | 0.06 | 0.09 |
| Inpatient non-surgical/medical visit                            | 0.15 | 0.12 | 0.18 |
| Lactate dehydrogenase                                           | 0.15 | 0.12 | 0.18 |

Acala=acalabrutinib; AE=adverse event; B=bendamustine; C=cycle;

Clb=chlorambucil; CT=computed tomography; FCR=fludarabine, cyclophosphamide and rituximab; G=obinutuzumab; HR=hazard ratio; Ibr=ibrutinib; IRR, infusion-related reaction; IV=intravenous; OS=overall survival; PFS=progression-free survival;

R=rituximab; SC=subcutaneous; Ven=venetoclax

**Supplementary Table 5. Cost-Effectiveness of VenG Compared with Other Treatments, Scenario Adjusted for GClb Dosing**

| Treatment   | Total costs (\$) | Life-years gained | QALYs gained | Incremental costs (\$) | Incremental life-years gained | Incremental QALYs gained | ICER (\$/QALY)  |
|-------------|------------------|-------------------|--------------|------------------------|-------------------------------|--------------------------|-----------------|
| <b>VenG</b> | <b>\$291,012</b> | <b>13.01</b>      | <b>6.521</b> | -                      | -                             | -                        | -               |
| GClb        | \$491,040        | 13.01             | 6.188        | \$200,028              | 0                             | -0.333                   | <b>Dominant</b> |
| BR          | \$591,957        | 6.40              | 3.365        | \$300,945              | -6.61                         | -3.157                   | <b>Dominant</b> |
| lbr         | \$836,734        | 6.40              | 3.492        | \$545,722              | -6.61                         | -3.029                   | <b>Dominant</b> |
| lbr+G       | \$1,143,355      | 7.20              | 4.008        | \$852,343              | -5.81                         | -2.514                   | <b>Dominant</b> |
| lbr+R       | \$898,024        | 6.33              | 3.463        | \$607,012              | -6.68                         | -3.058                   | <b>Dominant</b> |
| Acala       | \$1,391,132      | 9.53              | 5.856        | \$1,100,120            | -3.48                         | -0.665                   | <b>Dominant</b> |
| Acala+G     | \$1,584,434      | 10.56             | 6.499        | \$1,293,422            | -2.45                         | -0.022                   | <b>Dominant</b> |

Acala=acalabrutinib; B=bendamustine; Clb=chlorambucil; G=obinutuzumab; lbr=ibrutinib; ICER=incremental cost-effectiveness ratio; QALY=quality-adjusted life year; R=rituximab; Ven=venetoclax.

**Supplementary Table 6.** Cost-Effectiveness of VenG Compared with Other Treatments, Scenario Assuming Treatment Effect for OS (Dependent Model, Exponential Distribution)

| Treatment   | Total costs (\$)  | Life-years gained | QALYs gained | Incremental costs (\$) | Incremental life-years gained | Incremental QALYs gained | ICER (\$/QALY)      |
|-------------|-------------------|-------------------|--------------|------------------------|-------------------------------|--------------------------|---------------------|
| <b>VenG</b> | <b>\$299, 846</b> | <b>13.05</b>      | <b>6.537</b> | -                      | -                             | -                        | -                   |
| GClb        | \$491,040         | 13.01             | 6.188        | \$191,194              | -0.04                         | -0.349                   | <b>Dominant</b>     |
| BR          | \$595, 837        | 12.35             | 5.833        | \$295,992              | -0.70                         | -0.705                   | <b>Dominant</b>     |
| lbr         | \$1,040,985       | 12.35             | 5.963        | \$745,744              | -0.70                         | -0.516                   | <b>Dominant</b>     |
| lbr+G       | \$1,045,590       | 13.05             | 6.022        | \$1,479,685            | 0.01                          | 0.022                    | <b>\$67,560,740</b> |
| lbr+R       | \$1,779,531       | 12.26             | 6.559        | \$741,139              | -0.78                         | -0.574                   | <b>Dominant</b>     |
| Acala       | \$1,870,806       | 13.56             | 7.196        | \$1,570,960            | 0.51                          | 0.658                    | <b>\$2,386,056</b>  |
| Acala+G     | \$1,947,166       | 13.56             | 7.482        | \$1,647,320            | 0.51                          | 0.945                    | <b>\$1,743,895</b>  |

Acala=acalabrutinib; B=bendamustine; Clb=chlorambucil; lbr=ibrutinib; ICER=incremental cost-effectiveness ratio;

G=obinutuzumab; OS=overall survival; QALY=quality-adjusted life-year; R=rituximab; Ven=venetoclax.

**Supplementary Table 7.** Cost-Effectiveness of VenG Compared with Other Treatments, Scenario Assuming no Treatment Effect for OS (Dependent Model, Log-Normal Distribution)

| Treatment   | Total costs (\$) | Life-years gained | QALYs gained | Incremental costs (\$) | Incremental life-years gained | Incremental QALYs gained | ICER (\$/QALY)      |
|-------------|------------------|-------------------|--------------|------------------------|-------------------------------|--------------------------|---------------------|
| <b>VenG</b> | <b>\$308,763</b> | <b>13.15</b>      | 6.581        | -                      | -                             | -                        | -                   |
| GClb        | \$491,169        | 13.15             | 6.248        | -\$182,405             | 0.00                          | -0.333                   | <b>Dominant</b>     |
| BR          | \$595,980        | 12.46             | 5.880        | -\$287,217             | -0.69                         | -0.701                   | <b>Dominant</b>     |
| lbr         | \$1,041,129      | 12.46             | 6.011        | -\$736,970             | -0.69                         | -0.512                   | <b>Dominant</b>     |
| lbr+G       | \$1,045,733      | 13.15             | 6.069        | -\$1,471,187           | 0.00                          | 0.021                    | <b>\$69,556,437</b> |
| lbr+R       | \$1,779,950      | 12.37             | 6.602        | -\$732,366             | -0.77                         | -0.570                   | <b>Dominant</b>     |
| Acala       | \$1,870,831      | 13.56             | 7.195        | -\$1,562,067           | 0.41                          | 0.614                    | <b>\$2,542,960</b>  |
| Acala+G     | \$1,947,166      | 13.56             | 7.482        | -\$1,638,403           | 0.41                          | 0.901                    | <b>\$1,818,051</b>  |

Acala=acalabrutinib; B=bendamustine; Clb=chlorambucil; G=obinutuzumab; lbr=ibrutinib; ICER=incremental cost-effectiveness ratio; OS=overall survival; QALY=quality-adjusted life-year; R=rituximab; Ven=venetoclax.
